# Supplementary material for: Sources of artifact in measurements of 6mA and 4mC abundance in eukaryotic genomic DNA
Source: PubMed Central journal article supplement (PMC6547475; doi:10.1186/s12864-019-5754-6), 2019-06-03

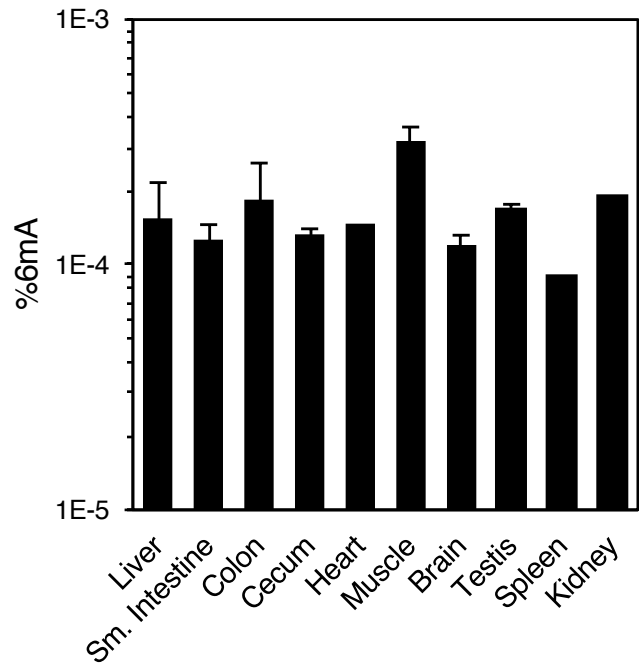

Supplement: 12864_2019_5754_MOESM3_ESM.pdf [file 12864_2019_5754_MOESM3_ESM.pdf]
